# Supplementary material
Source: MDPI journal article supplement (https://www.mdpi.com/2071-1050/14/23/15629)
Supplement: s1 [file s1]

Figure S1

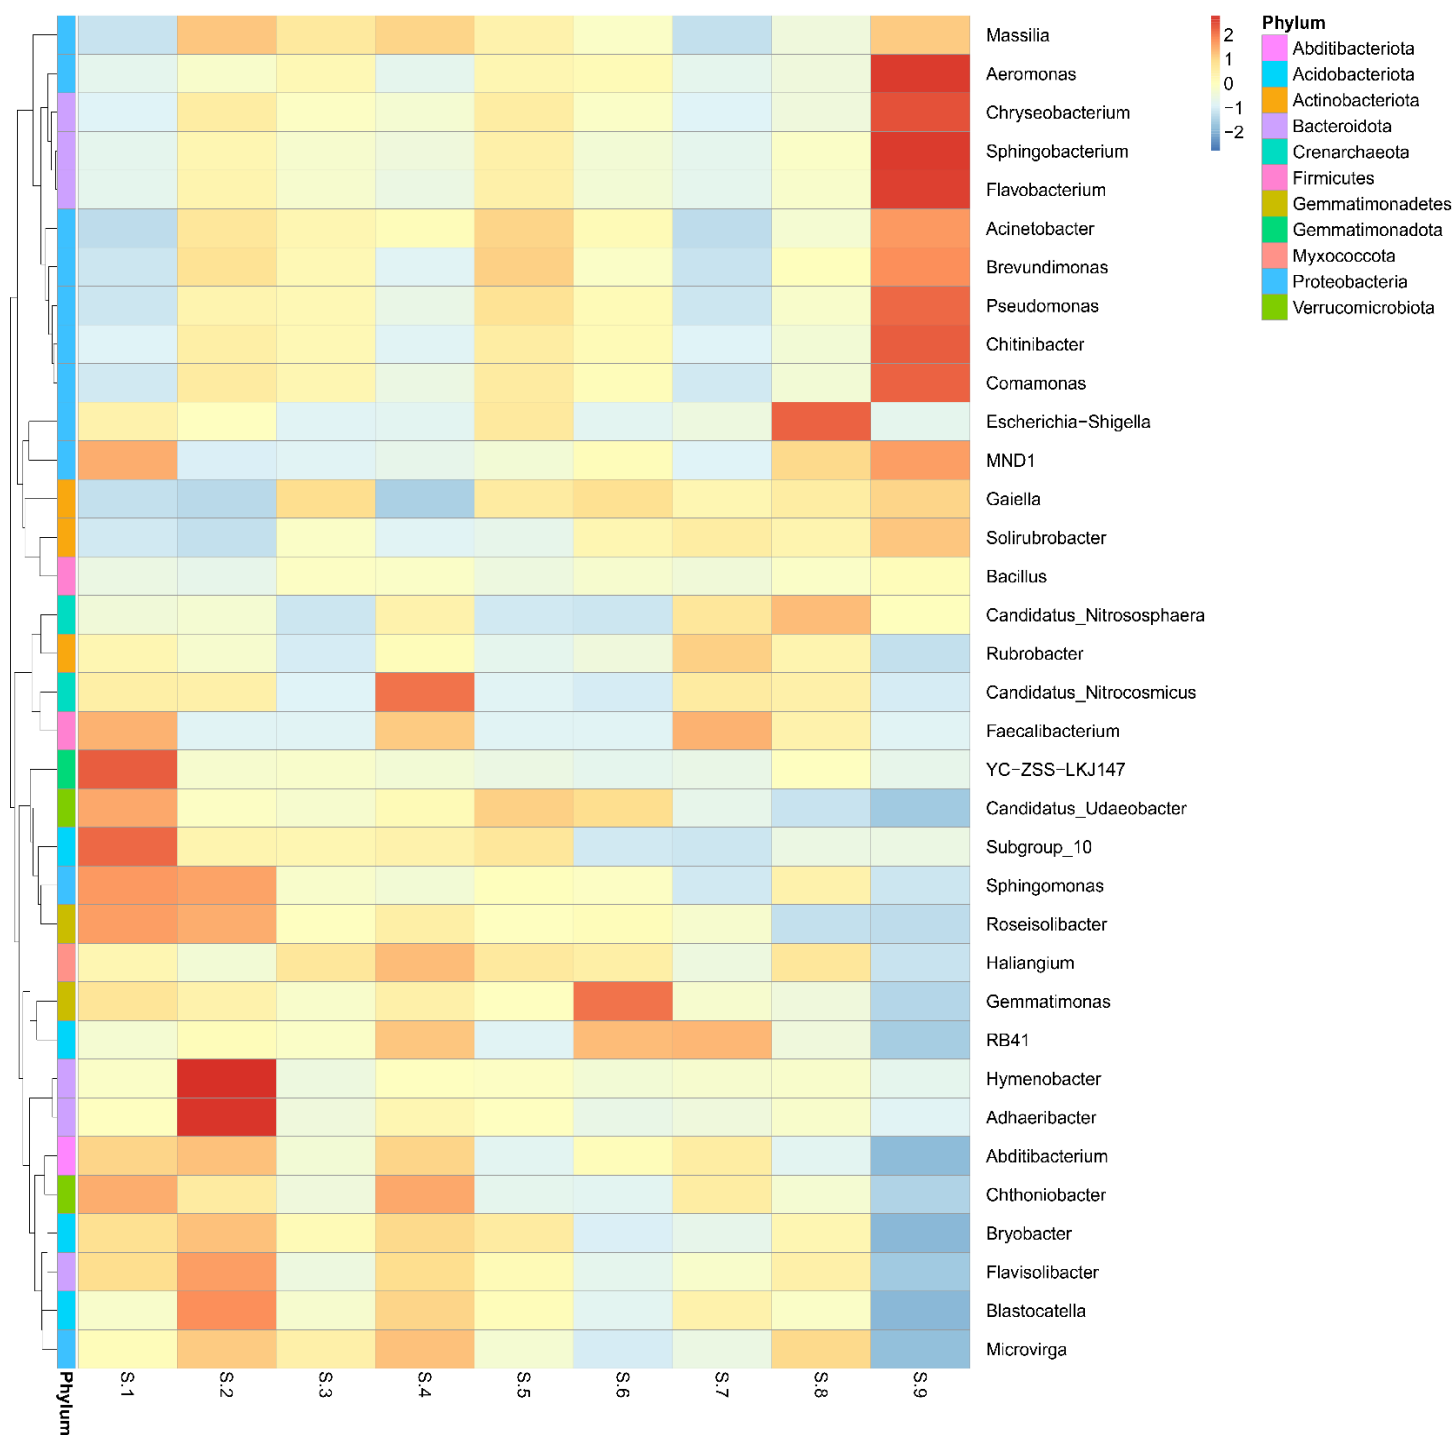

Figure S1. Heat-map of genus based on the microbial phylogeny in different sampling sites

Table S1. Relative abundance of main 10 phyla (%)

| Taxon | unidentified_B | Acidobacteriota | Proteoba- | Actinobac | Crenarcha | Verrucomi | Firmicutes | Bacteroid | Actinobacteri | Planctomy |
|-------|----------------|-----------------|-----------|-----------|-----------|-----------|------------|-----------|---------------|-----------|
| -omy  | acteria        |                 | acteria   | -teriota  | -eota     | -crobiota |            | ota       | a             | -cetota   |
| S.1   | 14.29          | 13.69           | 12.23     | 11.98     | 1.78      | 5.71      | 5.58       | 3.44      | 3.55          | 3.21      |
| S.2   | 12.62          | 14.55           | 16.88     | 10.93     | 2.11      | 3.8       | 0.38       | 5.23      | 3.45          | 2.05      |
| S.3   | 16             | 16.16           | 13.07     | 13.07     | 0.97      | 3.63      | 0.62       | 2.56      | 4.1           | 1.69      |
| S.4   | 14.19          | 18.03           | 12.03     | 11.56     | 3.38      | 4.36      | 2.66       | 3.32      | 3.78          | 2.96      |
| S.5   | 16.25          | 13.32           | 16.41     | 11.71     | 1.11      | 5.05      | 0.5        | 3.8       | 3.91          | 1.52      |
| S.6   | 17.23          | 16.98           | 11.33     | 14.21     | 0.99      | 4.86      | 0.61       | 2.26      | 3.85          | 2.18      |
| S.7   | 15.83          | 16.43           | 7.53      | 16.48     | 3         | 3.47      | 4.89       | 2.76      | 5.08          | 2.21      |
| S.8   | 17.6           | 13.83           | 13.69     | 13.97     | 3.64      | 2.66      | 2.88       | 3.29      | 3.97          | 1.65      |
| S.9   | 23.45          | 10.31           | 16.26     | 14.8      | 2.41      | 1.91      | 0.74       | 4.14      | 2.93          | 1.88      |

Table S2. Relative abundance of main 10 genera (%)

| Taxonomy | RB41 | Candidatus<br>_Udaeobacter | Rubrobacter | Candidatus<br>_Nitrososphaera | Acinetobacter | Sphingobacterium | Aeromonas | Sphingomonas | Hymenobacter | Solirubrobacter |
|----------|------|----------------------------|-------------|-------------------------------|---------------|------------------|-----------|--------------|--------------|-----------------|
| S.1      | 6.57 | 4.13                       | 4.55        | 0.54                          | 0             | 0                | 0         | 1.53         | 0.16         | 0.98            |
| S.2      | 7.36 | 2.49                       | 3.81        | 0.59                          | 1.05          | 0.41             | 0.36      | 1.48         | 0.83         | 0.92            |
| S.3      | 6.94 | 2.34                       | 2.72        | 0.28                          | 0.84          | 0.21             | 0.64      | 0.73         | 0.08         | 1.31            |
| S.4      | 9.49 | 2.72                       | 4.27        | 0.82                          | 0.72          | 0.11             | 0.01      | 0.66         | 0.19         | 1.05            |
| S.5      | 5.52 | 3.7                        | 3.17        | 0.3                           | 1.23          | 0.48             | 0.66      | 0.82         | 0.17         | 1.11            |
| S.6      | 9.67 | 3.5                        | 3.52        | 0.29                          | 0.75          | 0.16             | 0.6       | 0.77         | 0.12         | 1.45            |
| S.7      | 9.75 | 1.85                       | 5.63        | 0.94                          | 0             | 0                | 0         | 0.36         | 0.14         | 1.55            |
| S.8      | 6.28 | 1.36                       | 4.6         | 1.16                          | 0.53          | 0.25             | 0.17      | 0.96         | 0.15         | 1.47            |
| S.9      | 4.17 | 0.87                       | 2.48        | 0.71                          | 1.61          | 1.4              | 2.27      | 0.33         | 0.03         | 1.79            |
